# Supplementary material for: Decreased Adiponectin Levels in Early Pregnancy Are Associated with High Risk of Prematurity for African American Women
Source: MDPI journal article supplement (doi:10.3390/jcm11113213), 2022-06-04
Supplement: s1 [file s1]

**Table S1.** Differences in cytokine/adipokine concentrations at entry with adverse pregnancy outcomes

|                     | <b>Preterm with<br/>Preeclampsia</b> | <b>Preeclampsia</b>       | <b>Preterm<br/>Delivery</b> | <b>GDM</b>                | <b>Normal<br/>Control</b> |
|---------------------|--------------------------------------|---------------------------|-----------------------------|---------------------------|---------------------------|
| <b>n</b>            | <b>42</b>                            | <b>103</b>                | <b>148</b>                  | <b>77</b>                 | <b>1,406</b>              |
| Adiponectin (µg/mL) | 16.01 ± 1.39 <sup>a</sup>            | 18.19 ± 0.89 <sup>a</sup> | 17.56 ± 0.74 <sup>a</sup>   | 14.79 ± 1.04 <sup>b</sup> | 17.87 ± 0.24              |
| Resistin (ng/mL)    | 50.00 ± 4.18                         | 44.97 ± 2.67              | 48.47 ± 2.23                | 48.13 ± 3.12              | 47.48 ± 0.72              |
| GMCSF (pg/mL)       | 158.79 ± 42.68                       | 160.50 ± 27.27            | 174.11 ± 22.71              | 163.38 ± 31.79            | 186.71 ± 7.38             |
| IL10 (pg/mL)        | 8.79 ± 10.25                         | 14.14 ± 6.55              | 26.86 ± 5.46                | 6.86 ± 7.64               | 11.16 ± 1.77              |
| IL8 (pg/mL)         | 23.67 ± 18.89                        | 22.71 ± 12.07             | 29.07 ± 10.05               | 32.51 ± 14.07             | 37.70 ± 3.27              |
| IL6 (pg/mL)         | 2.37 ± 2.01                          | 3.99 ± 1.29               | 3.78 ± 1.07                 | 4.10 ± 1.50               | 4.21 ± 0.35               |
| TNFα (pg/mL)        | 9.77 ± 2.32                          | 10.36 ± 1.48              | 9.72 ± 1.24                 | 9.06 ± 1.73               | 10.71 ± 0.40              |

GDM, gestational diabetes mellitus.

Data are mean ± SE that were adjusted for maternal age, pre-pregnancy BMI, cigarette smoking and ethnicity. Log10 transformation was used for data analysis.

Forty two women with preterm delivery were also complicated with preeclampsia; thirteen women with GDM were also complicated with preterm delivery and preeclampsia.

a.  $p < 0.05$  vs. GDM

b.  $p < 0.001$  vs. normal controls

**Table S2.** Elevated cytokine and decreased adiponectin levels with preeclampsia and gestational diabetes mellitus (GDM) by ethnicity

| Cytokine/adipokine                     | Outcome variables | Unadjusted n (%)        | AOR (95% CI) <sup>a</sup> |
|----------------------------------------|-------------------|-------------------------|---------------------------|
| <b>African American</b>                |                   |                         |                           |
| Adiponectin (< 11.34 vs. ≥11.34 µg/mL) | Preeclampsia      | 24 (32.43)              | 1.09 (0.64, 1.88)         |
|                                        | GDM               | 8 (61.54)               | 2.24 (0.66, 7.57)         |
|                                        | Normal controls   | 153 (30.48)             | 1.00                      |
| IL10 (≥11.29 vs. <11.29 pg/mL)         | Preeclampsia      | 25 (33.78)              | 1.52 (0.90, 2.56)         |
|                                        | GDM               | 2 (15.38)               | 0.50 (0.11, 2.39)         |
|                                        | Normal controls   | 126 (25.10)             | 1.00                      |
| TNF-α (≥9.97 vs. <9.97 pg/mL)          | Preeclampsia      | 23 (31.08)              | 1.60 (0.93, 2.74)         |
|                                        | GDM               | 4 (30.77)               | 1.22 (0.35, 4.21)         |
|                                        | Normal controls   | 111 (22.11)             | 1.00                      |
| <b>Hispanic</b>                        |                   |                         |                           |
| Adiponectin (<11.34 vs. ≥11.34 µg/mL)  | Preeclampsia      | 13 (27.08)              | 1.46 (0.74, 2.90)         |
|                                        | GDM               | 18 (40.00)              | 1.86 (0.95, 3.62)         |
|                                        | Normal controls   | 141 (20.41)             | 1.00                      |
| IL10 (≥11.29 vs. < 11.29 pg/mL)        | Preeclampsia      | 10 (20.83)              | 0.83 (0.40, 1.71)         |
|                                        | GDM               | 5 (11.11)               | <b>0.38 (0.14, 0.99)</b>  |
|                                        | Normal controls   | 165 (23.83)             | 1.00                      |
| TNF-α (≥9.97 vs. <9.97 pg/mL)          | Preeclampsia      | 13 (27.08)              | 1.03 (0.53, 2.01)         |
|                                        | GDM               | 9 (20.00)               | 0.58 (0.27, 1.27)         |
|                                        | Normal controls   | 177 (25.62)             | 1.00                      |
| <b>Caucasians</b>                      |                   |                         |                           |
| Adiponectin (<11.34 vs. ≥11.34 µg/mL)  | Preeclampsia      | 7 (30.43)               | <b>2.97 (1.08, 8.17)</b>  |
|                                        | GDM               | 6 (31.58)               | 2.21 (0.70, 7.04)         |
|                                        | Normal controls   | 29 (13.62) <sup>c</sup> | 1.00                      |
| IL10 (≥11.29 vs. <11.29 pg/mL)         | Preeclampsia      | 4 (17.39)               | 0.63 (0.20, 1.97)         |
|                                        | GDM               | 4 (21.05)               | 0.71 (0.21, 2.40)         |
|                                        | Normal controls   | 61 (28.64)              | 1.00                      |
| TNF-α (≥9.97 vs. <9.97 pg/mL)          | Preeclampsia      | 4 (17.39)               | 0.46 (0.15, 1.47)         |
|                                        | GDM               | 5 (26.32)               | 0.65 (0.20, 2.12)         |
|                                        | Normal controls   | 58 (27.23)              | 1.00                      |

Adiponectin was defined as the lowest quartile vs. other quartiles pooled; other cytokines were defined as the highest quartile vs. other quartiles pooled.

- a. Models were adjusted for maternal age, parity, pre-pregnancy BMI and cigarette smoking with exclusion of preterm delivery patients.
